# Supplementary material
Source: ML conference proceedings conference paper supplement (https://openaccess.thecvf.com/content/CVPR2021/html/Li_Ego-Exo_Transferring_Visual_CVPR_2021_paper.html)
Supplement: Supplementary file 2 [file Li_Ego-Exo_Transferring_Visual_CVPR_2021_supplemental.zip]

Archive with 7 entries (6 files):
- 01397-supp/
- 01397-supp/01397-supp.pdf
- __MACOSX/01397-supp/._01397-supp.pdf
- 01397-supp/.DS_Store
- __MACOSX/01397-supp/._.DS_Store
- 01397-supp/S6.Animated_version_of_qualitative_examples.mp4
- __MACOSX/01397-supp/._S6.Animated_version_of_qualitative_examples.mp4
